# Supplementary material
Source: HighWire-hosted journal article supplement (https://erj.ersjournals.com/content/60/1/2103132)
Supplement: inline-supplementary-material-1 [file inline-supplementary-material-1.pdf]

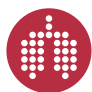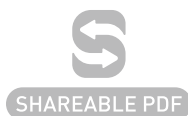

# Genetic overlap between idiopathic pulmonary fibrosis and COVID-19

Richard J. Allen<sup>1,5</sup>, Beatriz Guillen-Guio<sup>1,5</sup>, Emma Croot<sup>2</sup>, Luke M. Kraven<sup>1</sup>, Samuel Moss<sup>3</sup>, Iain Stewart<sup>3</sup>, R. Gisli Jenkins<sup>3</sup> and Louise V. Wain<sup>1,4</sup>

<sup>1</sup>Department of Health Sciences, University of Leicester, Leicester, UK. <sup>2</sup>Department of Genetics and Genome Biology, University of Leicester, Leicester, UK. <sup>3</sup>National Heart and Lung Institute, Imperial College London, London, UK. <sup>4</sup>National Institute for Health Research, Leicester Respiratory Biomedical Research Centre, Glenfield Hospital, Leicester, UK. <sup>5</sup>These authors contributed equally.

Corresponding author: Richard J. Allen ([rja34@leicester.ac.uk](mailto:rja34@leicester.ac.uk))

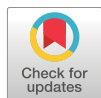

Shareable abstract (@ERSpublications)

**Positive genetic correlations for COVID-19 and IPF point to interferon-mediated innate immunity in both response to infection and chronic disease whilst negatively correlated signals highlight implications for drug targeting** <https://bit.ly/37MMxZa>

**Cite this article as:** Allen RJ, Guillen-Guio B, Croot E, *et al.* Genetic overlap between idiopathic pulmonary fibrosis and COVID-19. *Eur Respir J* 2022; 60: 2103132 [DOI: 10.1183/13993003.03132-2021].

This single-page version can be shared freely online.

Copyright ©The authors 2022. For reproduction rights and permissions contact [permissions@ersnet.org](mailto:permissions@ersnet.org)

Received: 10 Dec 2021  
Accepted: 7 April 2022

## To the Editor:

Coronavirus disease 2019 (COVID-19) is an infectious disease potentially leading to long-lasting respiratory symptoms and has resulted in over 4 million deaths worldwide. Idiopathic pulmonary fibrosis (IPF) is a chronic interstitial lung disease (ILD) characterised by an aberrant response to alveolar injury leading to progressive scarring of the lungs. Individuals with ILD are at a higher risk of death from COVID-19 [1].
